# Supplementary material
Source: PubMed Central journal article supplement (PMC3508170)

**SUPPLEMENTAL FIGURE 1**

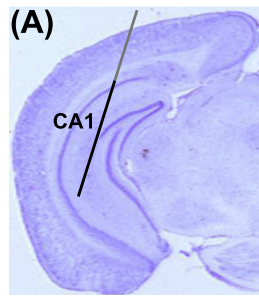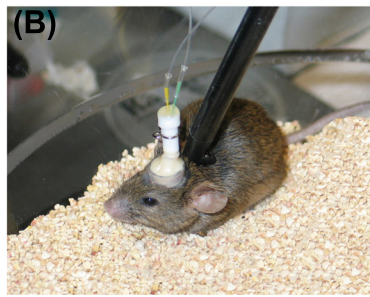

## SUPPLEMENTAL FIGURE 2

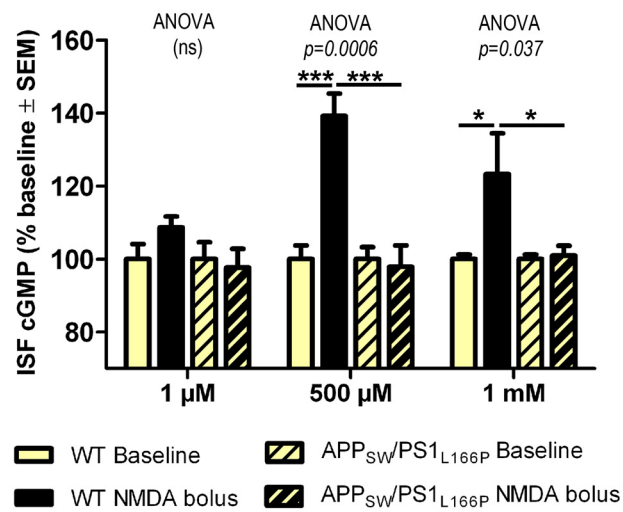

Supplement: NIHMS397934-supplement-01.pdf [file NIHMS397934-supplement-01.pdf]
